# Supplementary material
Source: publisher site journal article supplement (https://www.dovepress.com/get_supplementary_file.php?f=351672.docx)
Supplement: Supplementary file 1 [file get_supplementary_file.php]

**Supplementary materials**

*Supplementary Table 1 CMDI Scoring*

| Colon macroscopic damage index | | Score | |
| --- | --- | --- | --- |
| Colon adhesion | No adhesions | 0 | |
|  | Minor adhesions | 1 | |
|  | Major adhesions | 2 | |
| Ulcer and inflammation | No ulcer and inflammation | 0 | |
|  | Local congestion without ulcer | 1 | |
|  | 1 ulcer without congestion or bowel wall thickening | 2 | |
|  |  | |
|  | 1 ulcer with inflammation | 3 | |
|  | 2 ulcers and inflammation | 4 | |
|  | > 2 ulcers with inflammation or inflammation area > 1 cm | | 5 |
|  | Ulcer and/or inflammation area > 2cm, One more damage, plus 1 | 6~10 | |
|  |  | |
|  |  |  | |

*Supplementary Table 2 primer sequences*

| Gene | Primer F | Primer R | |
| --- | --- | --- | --- |
| *LOC102550026* | 5'TGCAGAGGCTCACGTCAAC 3' | | 5'CCAGAAGATGGGGTGGAGTGTTA 3' |
| *LOC102557338* | 5'CAGCTGCATTTCTGCCTGTG 3' | 5'TTTGGCCCAAAAGACATCAGTAGAT3' | |
| *miRNA-34a-5p* | 5'GGCAGTGTCTTAGCTGGTTGT 3' | - | |
| *miRNA-34c-5p* | 5'GGGAGGCAGTGTAGTTAGCTGAT 3'' | - | |
| *PCK1* | 5'CGAACGCCATTAAGACCATCCA3' | 5' GGCGCACGGTTCCTCAT 3' | |
| *pdzklip1* | 5'CCTTCGCCGTCAACCACT3' | 5'ATTCTTGTGCTCACTGGACCTAAA3' | |
| *acad10* | 5'CAAGCAGTACCGAGCAGCGGAA3' | 5'CCACCGTGGTCCTCTGTTGCTG3' | |
| *Rundc3b* | 5'GTTCCTCCAGAGCTAAGGGTAGA3' | 5'AGCAAGCATGTTTGCCTCTTC3' | |
| *Btnl5* | 5'GAACTGAAGGTGGCAGCGA3' | 5'CTGTGGAGTCTCTCCAGTGCAC' | |
| *ACTIN* | 5'CGTGAAAAGATGACCCAGAT 3' | 5' GAGGCATACAGGGACAACA 3' | |
| *U6* | 5' CTCGCTTCGGGCAGCACA 3' | 5' AACGCTTTCACGAATTTGCGT 3' | |

*Supplementary Table 3 top 10 upregulated and 10 downregulated DE lncRNAs* *in CD rats compared to control rats.*

| Gene ID | Gene symbol | Fold Change | Log2 FC | *P* | Trend |
| --- | --- | --- | --- | --- | --- |
| XR_001836356.1 | LOC108349824 | 40.8055168 | 5.35069231 | 6.19E-05 | UP |
| TCONS_00005405 | XLOC_002308 | 30.0773108 | 4.91060368 | 0.02009813 | UP |
| ENSRNOT00000088573 | AABR07030366.1 | 27.4857031 | 4.78060948 | 0.02831622 | UP |
| XR_001837174.1 | LOC108350414 | 27.1035746 | 4.76041123 | 0.02269502 | UP |
| XR_592136.2 | LOC103692137 | 26.7571053 | 4.74185014 | 0.0331885 | UP |
| XR_001837346.1 | LOC102550999 | 24.0616187 | 4.58866179 | 0.0004356 | UP |
| XR_001841345.1 | LOC108352931 | 22.3803532 | 4.4841609 | 0.01739995 | UP |
| XR_001840605.1 | LOC103690800 | 21.4737572 | 4.42450273 | 0.02074579 | UP |
| TCONS_00024642 | XLOC_010971 | 21.3819196 | 4.41831947 | 0.00772775 | UP |
| XR_001838234.1 | LOC102553857 | 20.4025261 | 4.35067588 | 0.04576952 | UP |
| XR_595488.2 | LOC102551374 | 0.01562709 | -5.9998066 | 0.00052571 | DOWN |
| TCONS_00001392 | - | 0.0168821 | -5.8883617 | 5.62E-07 | DOWN |
| ENSRNOT00000088504 | AABR07001210.1 | 0.02677029 | -5.2232236 | 0.01547617 | DOWN |
| TCONS_00033513 | XLOC_014899 | 0.02714521 | -5.2031583 | 0.03405309 | DOWN |
| XR_001840648.1 | LOC103690351 | 0.03681775 | -4.7634547 | 0.01179932 | DOWN |
| NR_126573.1 | Lnc016 | 0.04566562 | -4.4527479 | 0.04873645 | DOWN DOWN |
| TCONS_00025175 | XLOC_011204 | 0.04801347 | -4.380417 | 0.0042915 | DOWN |
| XR_001841031.1 | LOC102556249 | 0.0517306 | -4.2728383 | 0.02675403 | DOWN |
| XR_591644.2 | LOC102557338 | 0.0539545 | -4.2121128 | 0.00713307 | DOWN |
| XR_001837536.1 | LOC102550644 | 0.0549967 | -4.1845111 | 0.04285584 | DOWN |
|  |  |  |  |  |  |

DE: differentially expressed; FC: fold change.

*Supplementary Table 4 top 10 upregulated and 10 downregulated DE lncRNAs in HPMG rats compared to CD rats.*

| Gene ID | Gene symbol | Fold Change | Log2 FC | *P* | Trend |
| --- | --- | --- | --- | --- | --- |
| TCONS_00038369 | XLOC_017077 | 89.3623843 | 6.48159577 | 0.03905403 | UP |
| TCONS_00033513 | XLOC_014899 | 74.7356361 | 6.22372442 | 0.00051599 | UP |
| XR_596753.2 | LOC102547031 | 50.9814692 | 5.67190104 | 0.00599673 | UP |
| XR_001841634.1 | LOC102547443 | 42.5256113 | 5.41026007 | 0.01385186 | UP |
| TCONS_00032595 | - | 38.3056571 | 5.25948557 | 0.00112731 | UP |
| TCONS_00001392 | - | 32.573628 | 5.02563251 | 0.04417063 | UP |
| XR_001842540.1 | LOC102555972 | 31.9857143 | 4.9993558 | 0.02474636 | UP |
| TCONS_00025175 | XLOC_011204 | 31.7332963 | 4.98792548 | 0.00659969 | UP |
| XR_001836022.1 | LOC108349653 | 27.5507419 | 4.78401926 | 0.01565599 | UP |
| XR_001839797.1 | LOC108351919 | 23.3915241 | 4.54791396 | 0.01920893 | UP |
| TCONS_00000065 | XLOC_000033 | 0.00250478 | -8.641099 | 0.02359653 | DOWN |
| XR_001841345.1 | LOC108352931 | 0.0089245 | -6.8080136 | 0.00362039 | DOWN |
| XR_590884.2 | LOC102549347 | 0.02057227 | -5.603155 | 0.01412419 | DOWN |
| TCONS_00024617 | XLOC_010967 | 0.02768001 | -5.1750118 | 0.00641395 | DOWN |
| XR_001842095.1 | LOC108348777 | 0.04316716 | -4.5339221 | 0.04284947 | DOWN |
| XR_593912.1 | LOC103693092 | 0.0435216 | -4.5221244 | 1.69E-05 | DOWN DOWN |
| TCONS_00033619 |  | 0.04403987 | -4.5050459 | 0.00012542 | DOWN |
| TCONS_00023155 | XLOC_010279 | 0.05733298 | -4.124491 | 0.01135848 | DOWN |
| TCONS_00020409 | XLOC_009044 | 0.06248918 | -4.0002498 | 1.27E-08 | DOWN |
| TCONS_00034206 | XLOC_015198 | 0.06276584 | -3.9938765 | 0.01028192 | DOWN |
|  |  |  |  |  |  |

Supplementary Table 4. DE: differentially expressed; FC: fold change; HPM: Herb-partitioned moxibustion.

*Supplementary Table 5 top 10 upregulated and 5 downregulated DE miRNAs in CD rats compared to control rats.*

| Gene ID | Fold Change | Log2 FC | *P* | Trend |
| --- | --- | --- | --- | --- |
| novel416_mature | 10.8600841 | 3.44096337 | 0.03186168 | UP |
| rno-miR-741-3p | 7.69516474 | 2.94395221 | 0.03160565 | UP |
| novel192_mature | 6.69285115 | 2.74262093 | 0.03227581 | UP |
| rno-miR-3072 | 3.63949705 | 1.86373909 | 0.01744493 | UP |
| rno-miR-298-5p | 3.30674963 | 1.72541382 | 0.0152482 | UP |
| rno-miR-214-3p | 3.29693079 | 1.7211236 | 0.00029583 | UP |
| rno-miR-351-3p | 3.28382265 | 1.71537621 | 0.02223915 | UP |
| rno-miR-542-3p | 3.14602387 | 1.65352962 | 0.00170829 | UP |
| rno-miR-299a-5p | 2.96705849 | 1.56903337 | 0.01821287 | UP |
| rno-miR-296-3p | 2.83366486 | 1.50266914 | 0.04290171 | UP |
| novel657_mature | 0.08973707 | -3.4781521 | 0.04568866 | DOWN |
| novel150_mature | 0.15274707 | -2.7107834 | 0.02150168 | DOWN |
| novel457_mature | 0.18974446 | -2.3978703 | 0.03826498 | DOWN |
| novel243_mature | 0.23987696 | -2.0596335 | 0.01518777 | DOWN |
| novel171_mature | 0.26117394 | -1.9369171 | 0.04645601 | DOWN |
|  |  |  |  |  |

DE: differentially expressed; FC: fold change; miR: microRNA.

*Supplementary Table 6 6 upregulated and 3 downregulated DE miRNAs in* *HPMG rats compared to CD rats.*

| Gene ID | Fold Change | Log2 FC | *P* | Trend |
| --- | --- | --- | --- | --- |
| novel657_mature | 15.7826652 | 3.98026894 | 0.01135837 | UP |
| novel212_mature | 7.42095147 | 2.89160417 | 0.031113 | UP |
| novel150_mature | 5.92970406 | 2.56796011 | 0.01886833 | UP |
| novel223_mature | 5.89237089 | 2.55884824 | 0.03047341 | UP |
| novel270_mature | 4.04103584 | 2.01472515 | 0.02281555 | UP |
| novel14_mature | 2.93468652 | 1.5532064 | 0.023769 | UP |
| rno-miR-154-3p | 0.21324251 | -2.229433 | 0.04497616 | DOWN |
| rno-miR-31a-3p | 0.37917174 | -1.3990766 | 0.0490331 | DOWN |
| rno-miR-298-5p | 0.39775657 | -1.3300423 | 0.03577628 | DOWN |
|  |  |  |  |  |

DE: differentially expressed; FC: fold change; miR: microRNA; HPM: Herb-partitioned moxibustion.

*Supplementary Table 7 top 10 upregulated and 10 downregulated DE mRNAs in CD rats compared to control rats.*

| Gene ID | Fold Change | Log2 FC | *P* | Trend |
| --- | --- | --- | --- | --- |
| Cthrc1 | 137.387125 | 7.102103 | 1.47E-05 | UP |
| Mcpt1l1 | 101.846159 | 6.67024776 | 7.63E-05 | UP |
| Clec4d | 47.3877257 | 5.56644152 | 0.00618975 | UP |
| Tpsb2 | 40.4272924 | 5.33725768 | 2.24E-05 | UP |
| Cyp11b2 | 38.0262962 | 5.24892552 | 0.02944208 | UP |
| Tex15 | 28.7195827 | 4.84396288 | 0.01397561 | UP |
| Prss35 | 28.7060307 | 4.84328195 | 0.00030686 | UP |
| Mrgprb3 | 26.6197754 | 4.73442649 | 0.00096482 | UP |
| Tpsab1 | 26.2939767 | 4.71666045 | 0.00233906 | UP |
| LOC103690354 | 23.8689551 | 4.5770635 | 6.19E-06 | UP |
| Cyp1a1 | 0.00296771 | -8.3964338 | 0.01152504 | DOWN |
| LOC103692570 | 0.01914852 | -5.706623 | 0.00043472 | DOWN |
| LOC100910526 | 0.04290831 | -4.5425992 | 0.00342866 | DOWN |
| Pcgf1 | 0.04332661 | -4.5286028 | 0.0293275 | DOWN |
| Malrd1 | 0.04822655 | -4.3740286 | 0.00818295 | DOWN |
| Klk1 | 0.05451538 | -4.1971929 | 0.00752489 | DOWN DOWN |
| Fam134b | 0.0979441 | -3.3518976 | 0.00672603 | DOWN |
| Dnase1 | 0.11179139 | -3.1611191 | 0.02921938 | DOWN |
| Ces1c | 0.1150161 | -3.1200923 | 0.02086755 | DOWN |
| Sult1c2 | 0.14572745 | -2.7786554 | 3.14E-05 | DOWN |
|  |  |  |  |  |

DE: differentially expressed; FC: fold change.

*Supplementary Table 8 top 10 upregulated and 10 downregulated DE mRNAs in HPMG rats compared to CD rats.*

| Gene ID | Fold Change | Log2 FC | *P* | Trend |
| --- | --- | --- | --- | --- |
| Prss3 | 2474.85036 | 11.2731256 | 0.00716246 | UP |
| Pnlip | 2044.27093 | 10.9973707 | 0.00701021 | UP |
| LOC312273 | 1798.78751 | 10.8128091 | 0.01151921 | UP |
| LOC103689940 | 1770.31024 | 10.7897865 | 0.00815865 | UP |
| Prss2 | 1381.97381 | 10.4325146 | 0.00526444 | UP |
| Ctrb1 | 1335.25229 | 10.3828966 | 0.01246776 | UP |
| Prss1 | 1320.80618 | 10.3672031 | 0.00811767 | UP |
| Clps | 1264.82527 | 10.3047224 | 0.01331029 | UP |
| Cpb1 | 1049.97913 | 10.0361449 | 0.01343864 | UP |
| Cela2a | 1037.28741 | 10.0186 | 0.01419188 | UP |
| Tnn | 0.03595966 | -4.7974767 | 0.03071561 | DOWN |
| Prok2 | 0.04326496 | -4.5306573 | 0.03627282 | DOWN |
| LOC100363510 | 0.06729258 | -3.8934088 | 0.04481992 | DOWN |
| RGD1564744 | 0.07965558 | -3.6500807 | 0.01246329 | DOWN |
| LOC680316 | 0.08686932 | -3.5250095 | 0.02183079 | DOWN |
| Slc5a11 | 0.11141022 | -3.1660465 | 0.01794597 | DOWN DOWN |
| Tpsb2 | 0.11917849 | -3.0688043 | 0.00201539 | DOWN |
| Tpsab1 | 0.12079276 | -3.0493942 | 0.01722001 | DOWN |
| Dnah8 | 0.13189271 | -2.9225633 | 0.04569631 | DOWN |
| Atp13a5 | 0.13301523 | -2.9103367 | 0.00769716 | DOWN |
|  |  |  |  |  |

DE: differentially expressed; FC: fold change; HPM: Herb-partitioned moxibustion.

*Supplementary Table 9 Information of PPI network nodes.*

| gene1 | up_down | gene2 | up_down | combined_score |
| --- | --- | --- | --- | --- |
| *Heyl* | Up | *Per3* | Down | 370 |
| *Hsd11b* | Down | *Pck1* | Down | 287 |
| *Cmah* | Down | *Hsd11b2* | Down | 244 |
| *Cmah* | Down | *Prrx1* | Up | 229 |
| *Osgin1* | Down | *Pck1* | Down | 212 |
| *Acad10* | Down | *Pck1* | Down | 199 |
| *Pck1* | Down | *Per3* | Down | 187 |
| *Actn2* | Down | *Dok7* | Down | 154 |
|  |  |  |  |  |

*
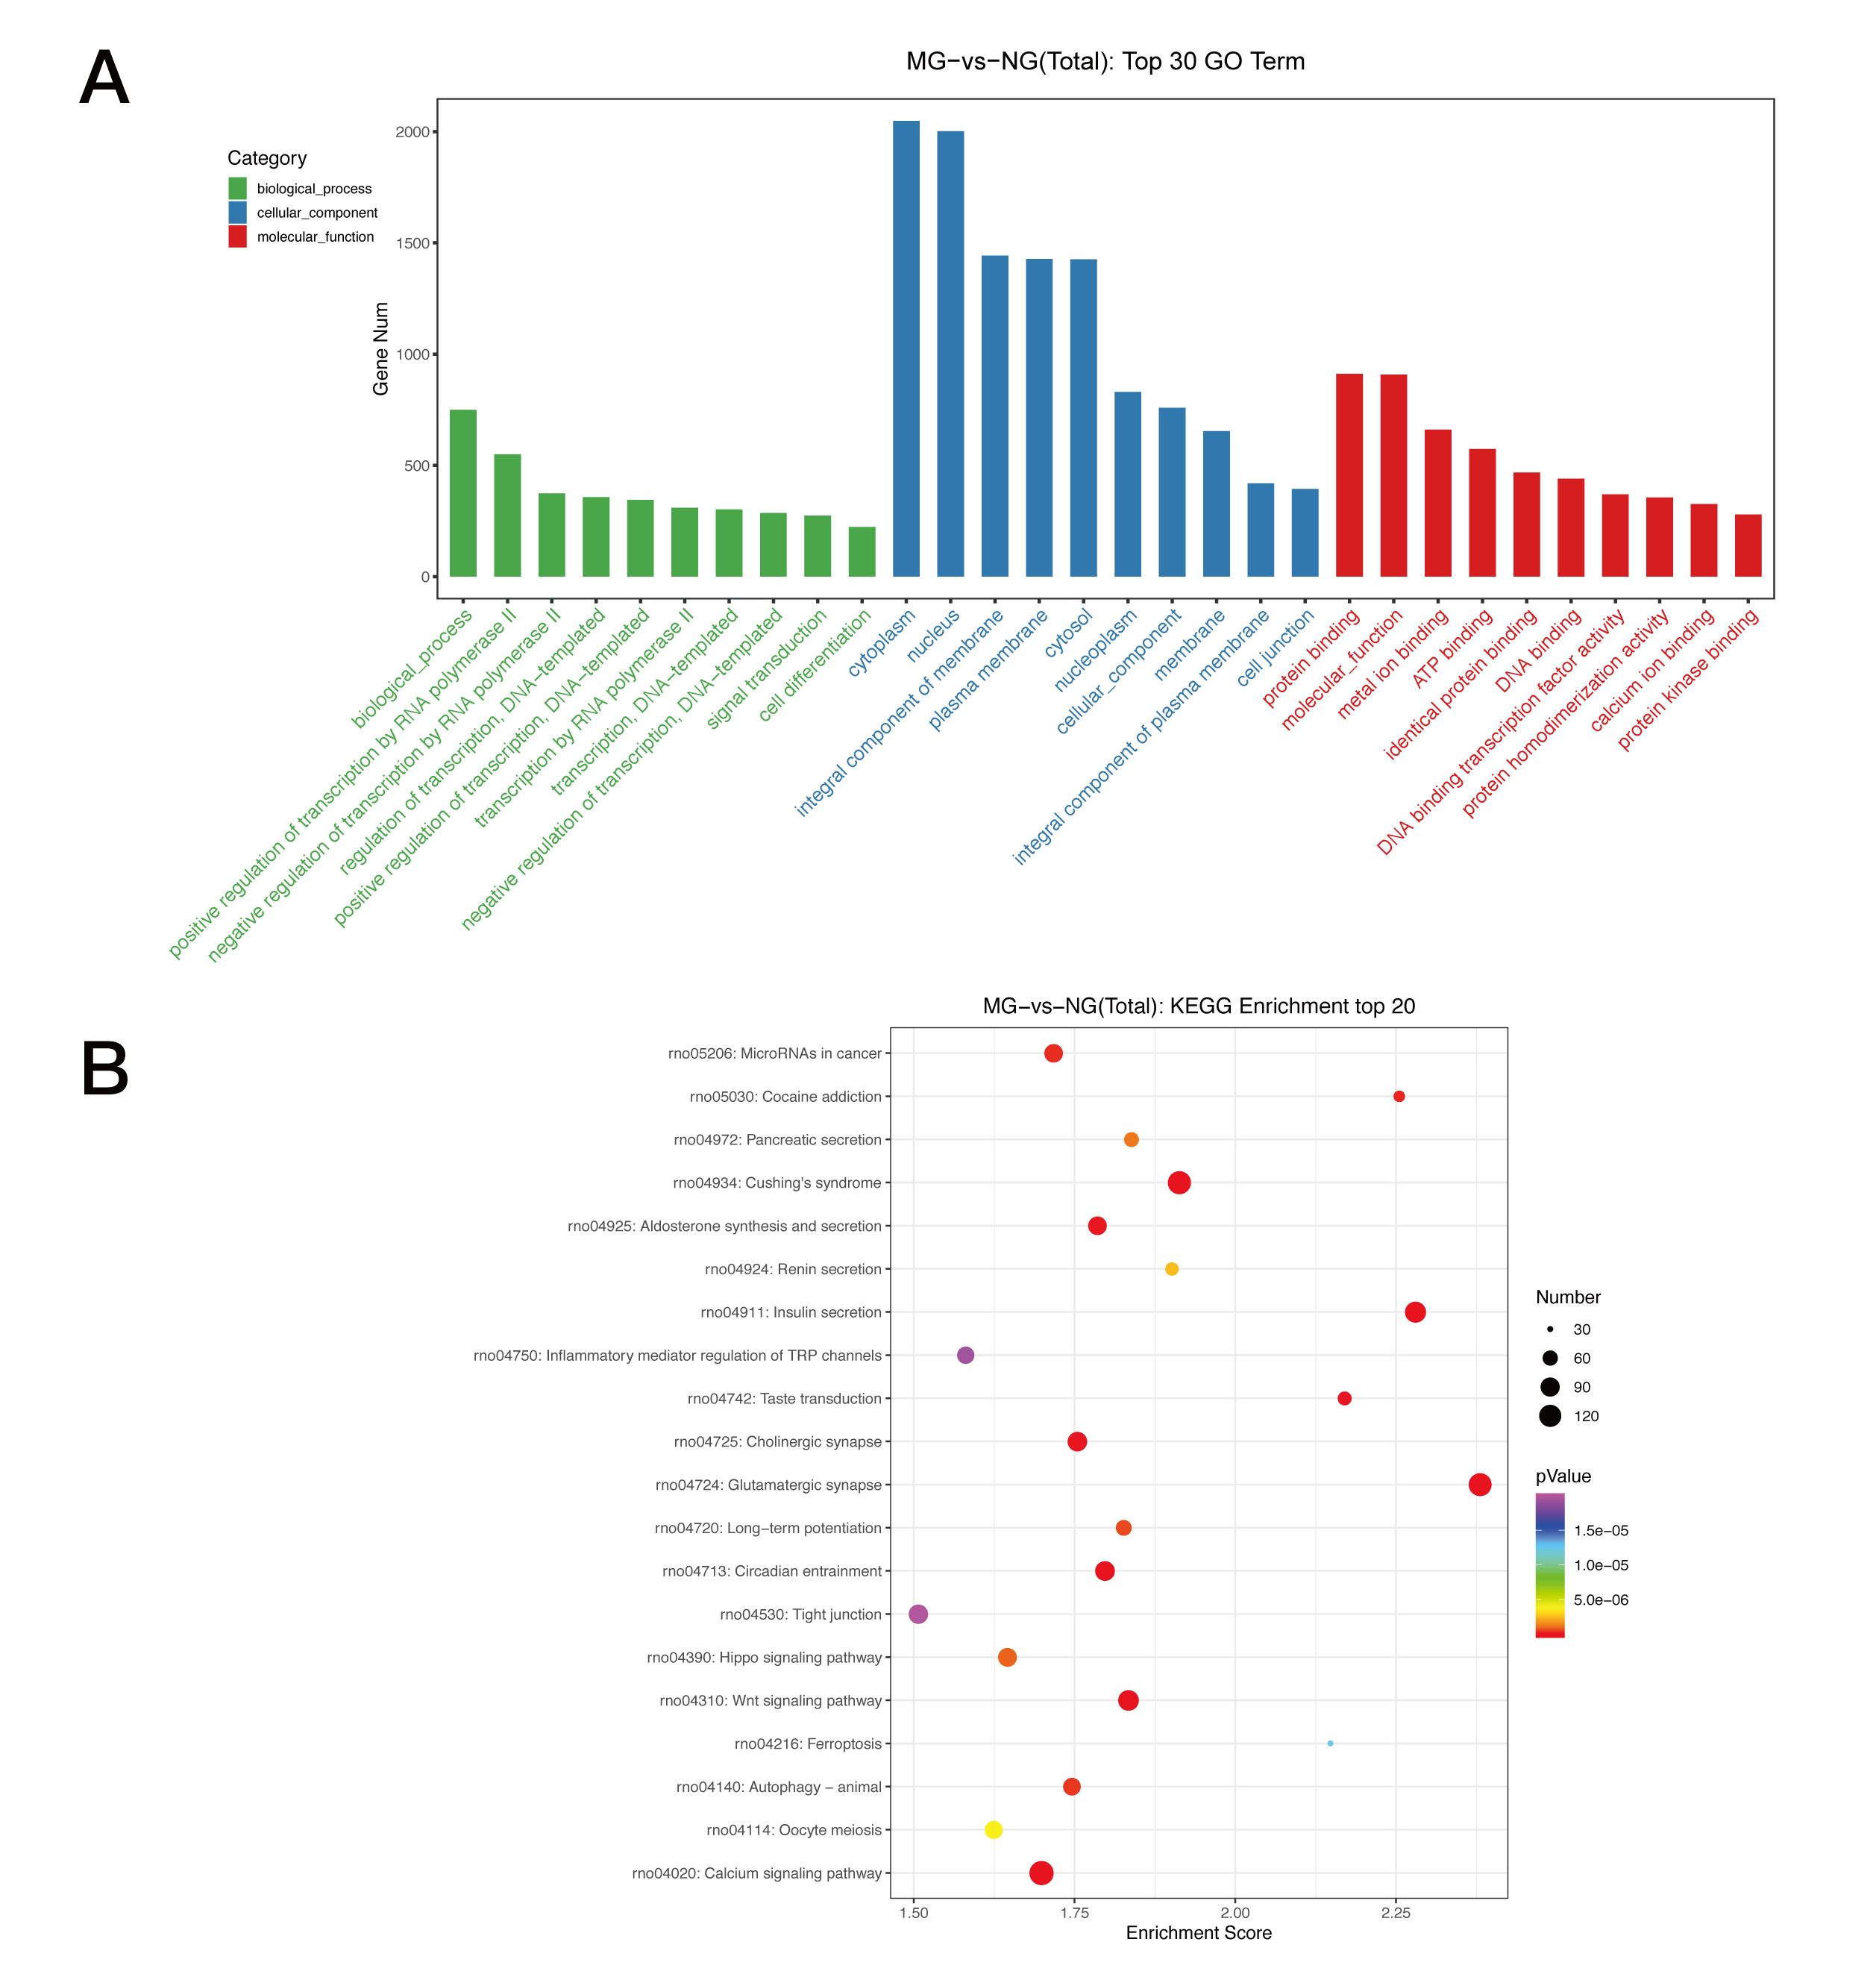
 Supplementary Figure 1* GO and KEGG enrichment analysis of the DE miRNAs between MG and NG rats.

Supplementary Figure 1 (A) top 30 GO terms from the miRNA enrichment analysis and (B) top 20 significant KEGG pathways between MG and NG. differentially expressed (DE); NG: control group; MG: model group.


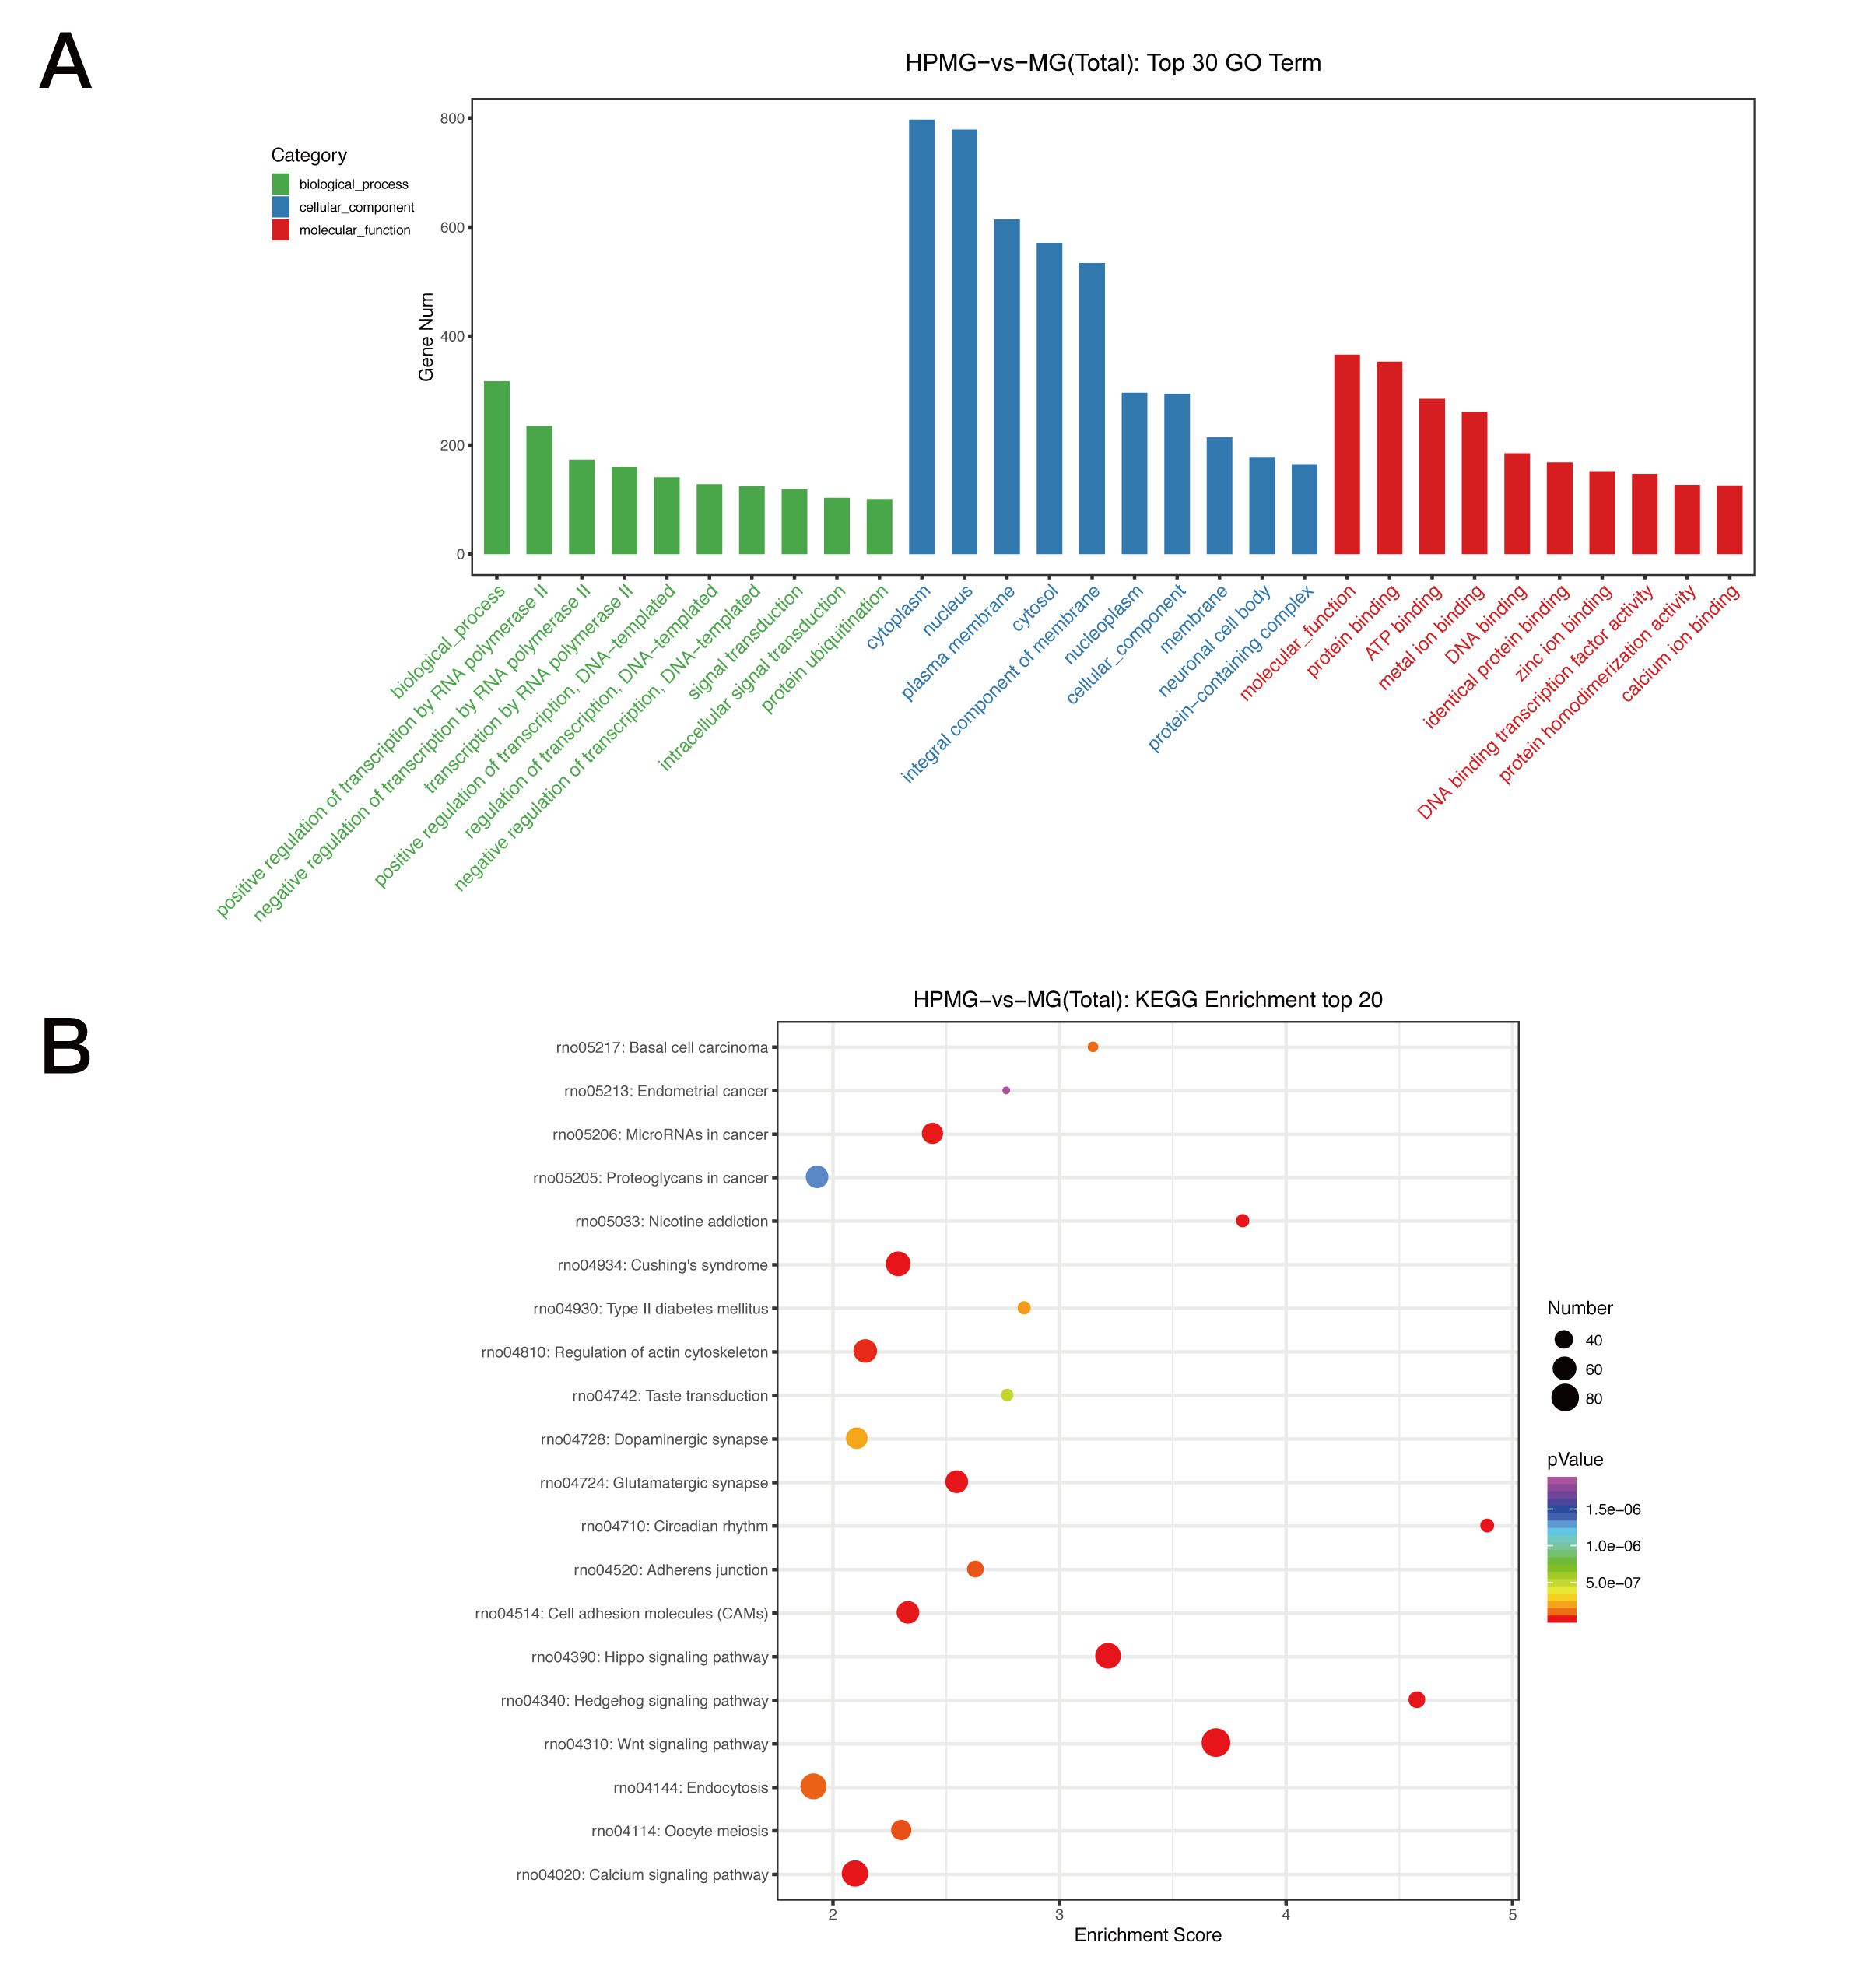


*Supplementary Figure 2* GO and KEGG enrichment analysis of the DE miRNAs between HPMG and MG rats

Supplementary Figure 2 (A) top 30 GO terms from the miRNA enrichment analysis and (B) top 20 significant KEGG pathways between HPMG and MG. differentially expressed (DE); MG: model group; HPMG: herb-partitioned moxibustion group.

*Supplementary Fig 3* GO and KEGG enrichment analysis of the DE mRNAs between MG and NG rats


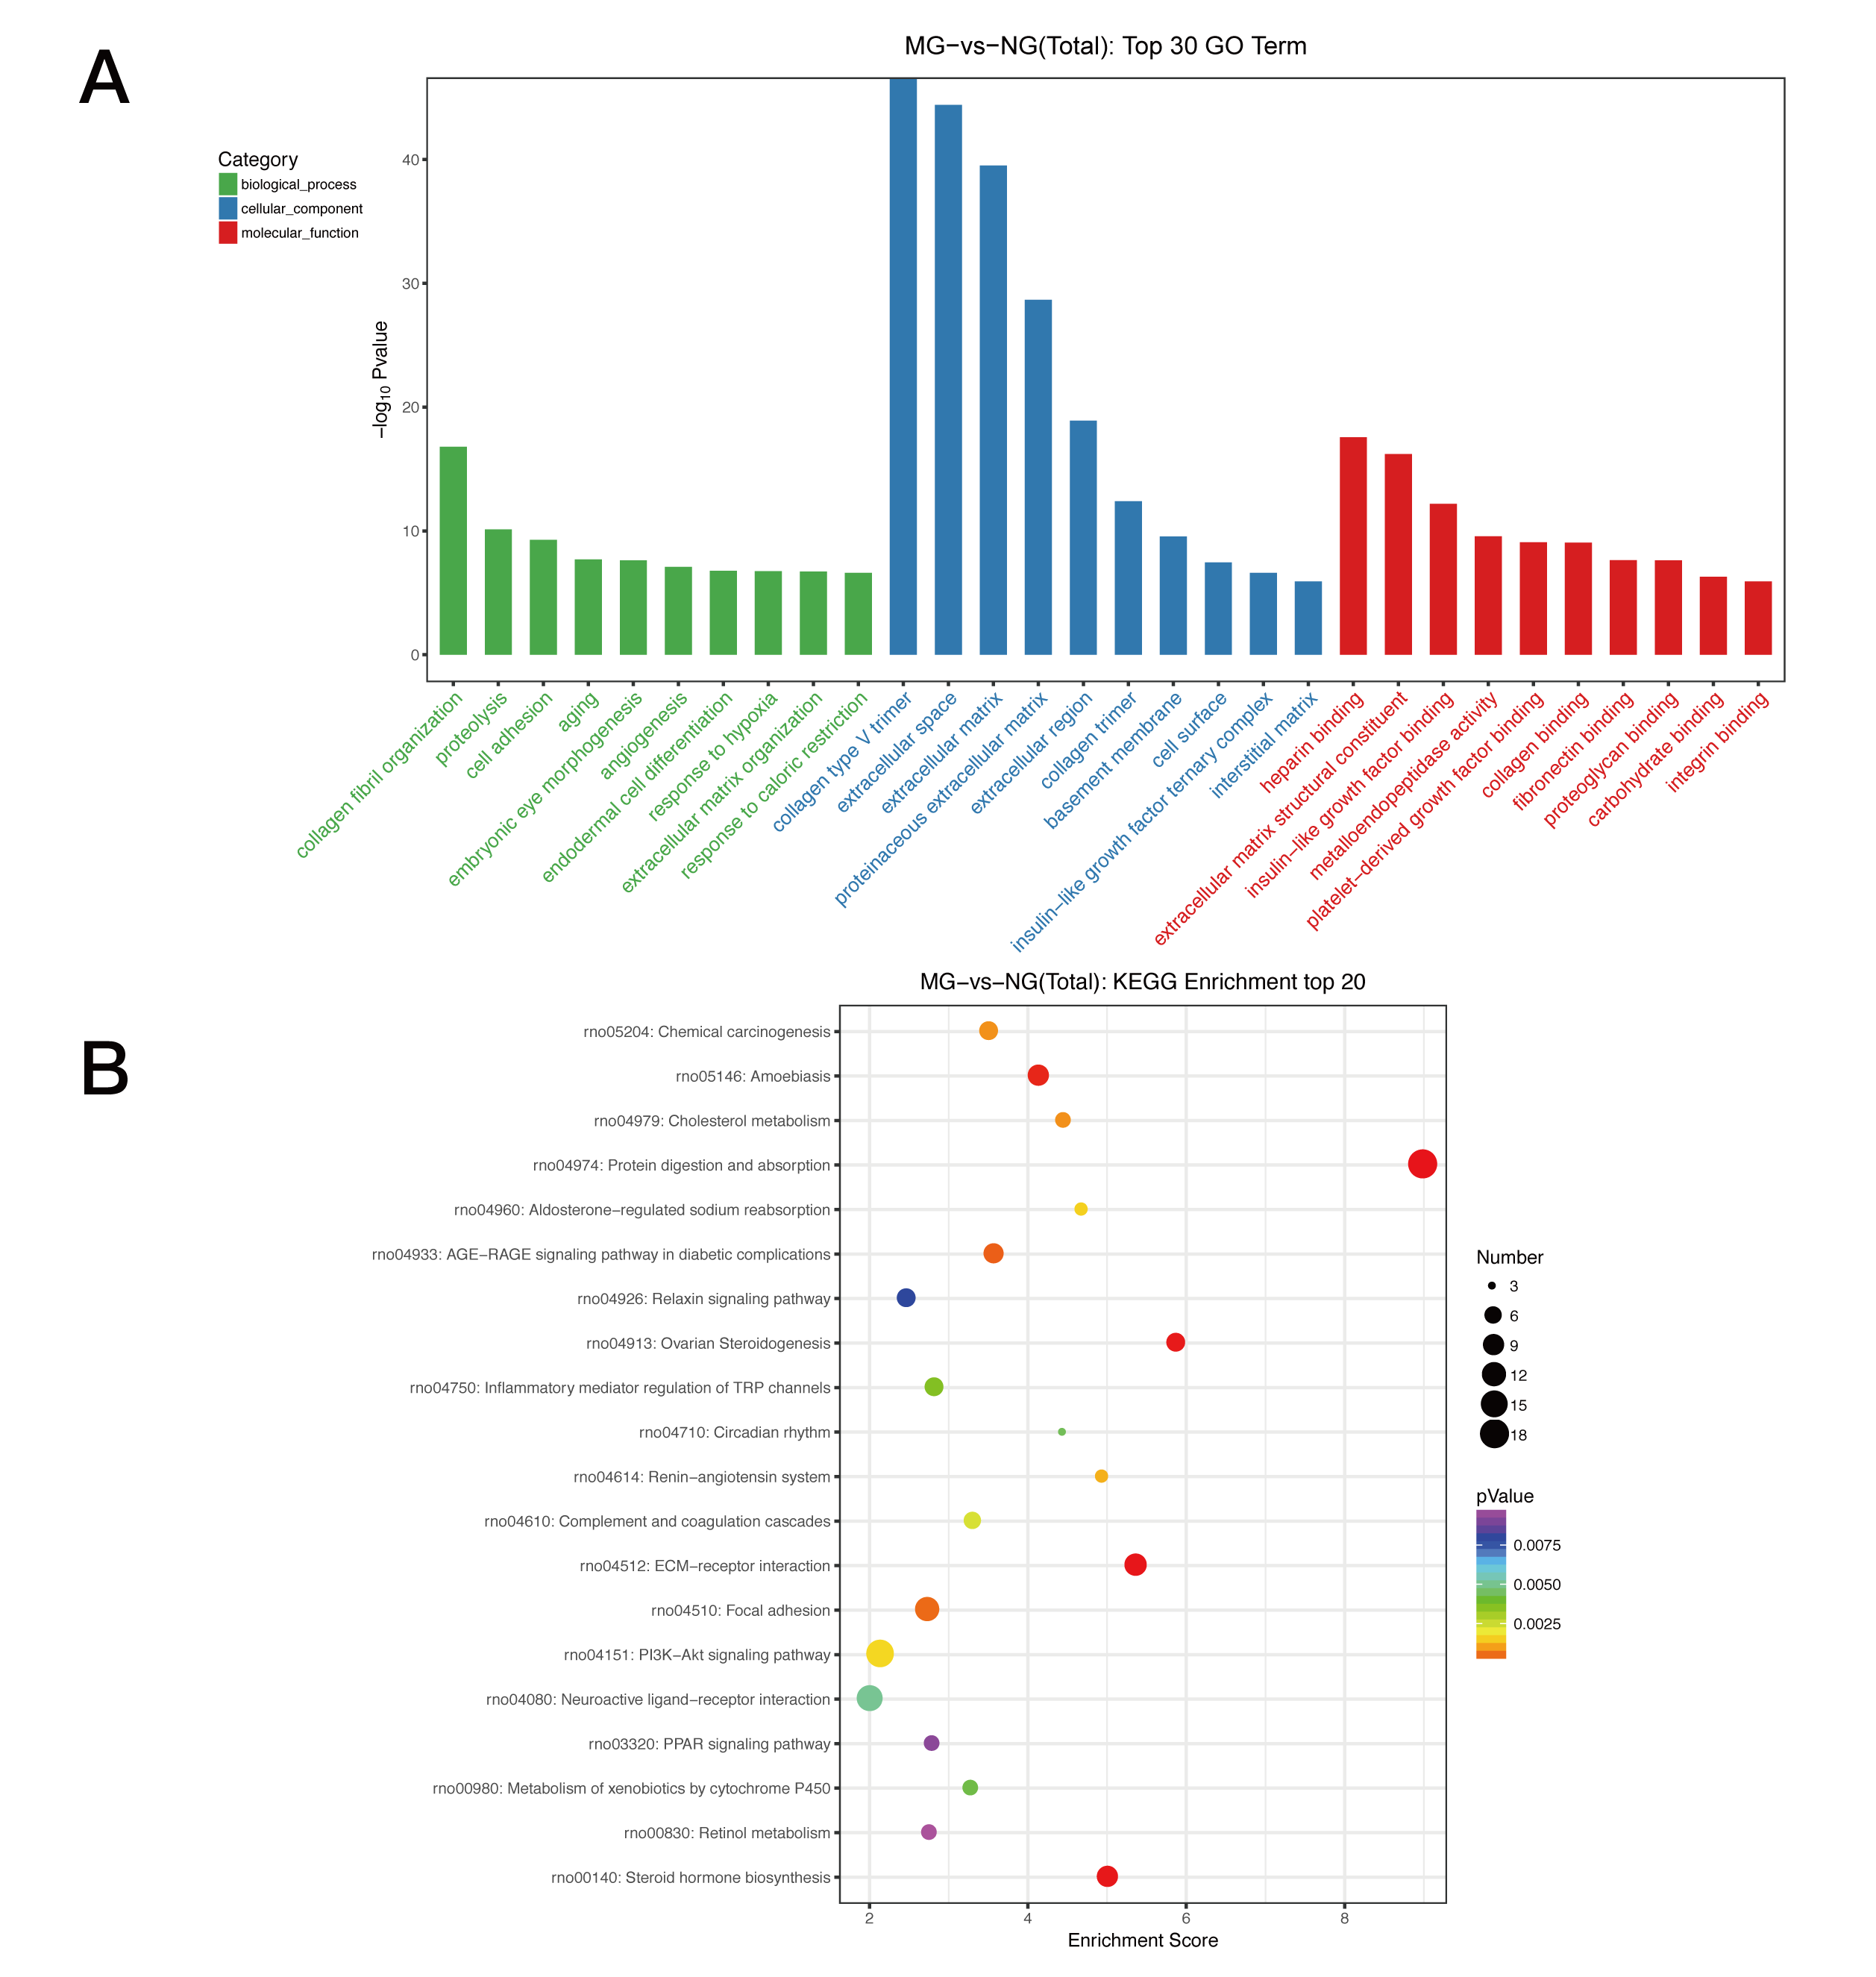


Supplementary Figure 3 (A) top 30 GO terms from the mRNA enrichment analysis and (B) top 20 significant KEGG pathways between MG and NG. differentially expressed (DE); NG: control group; MG: model group.


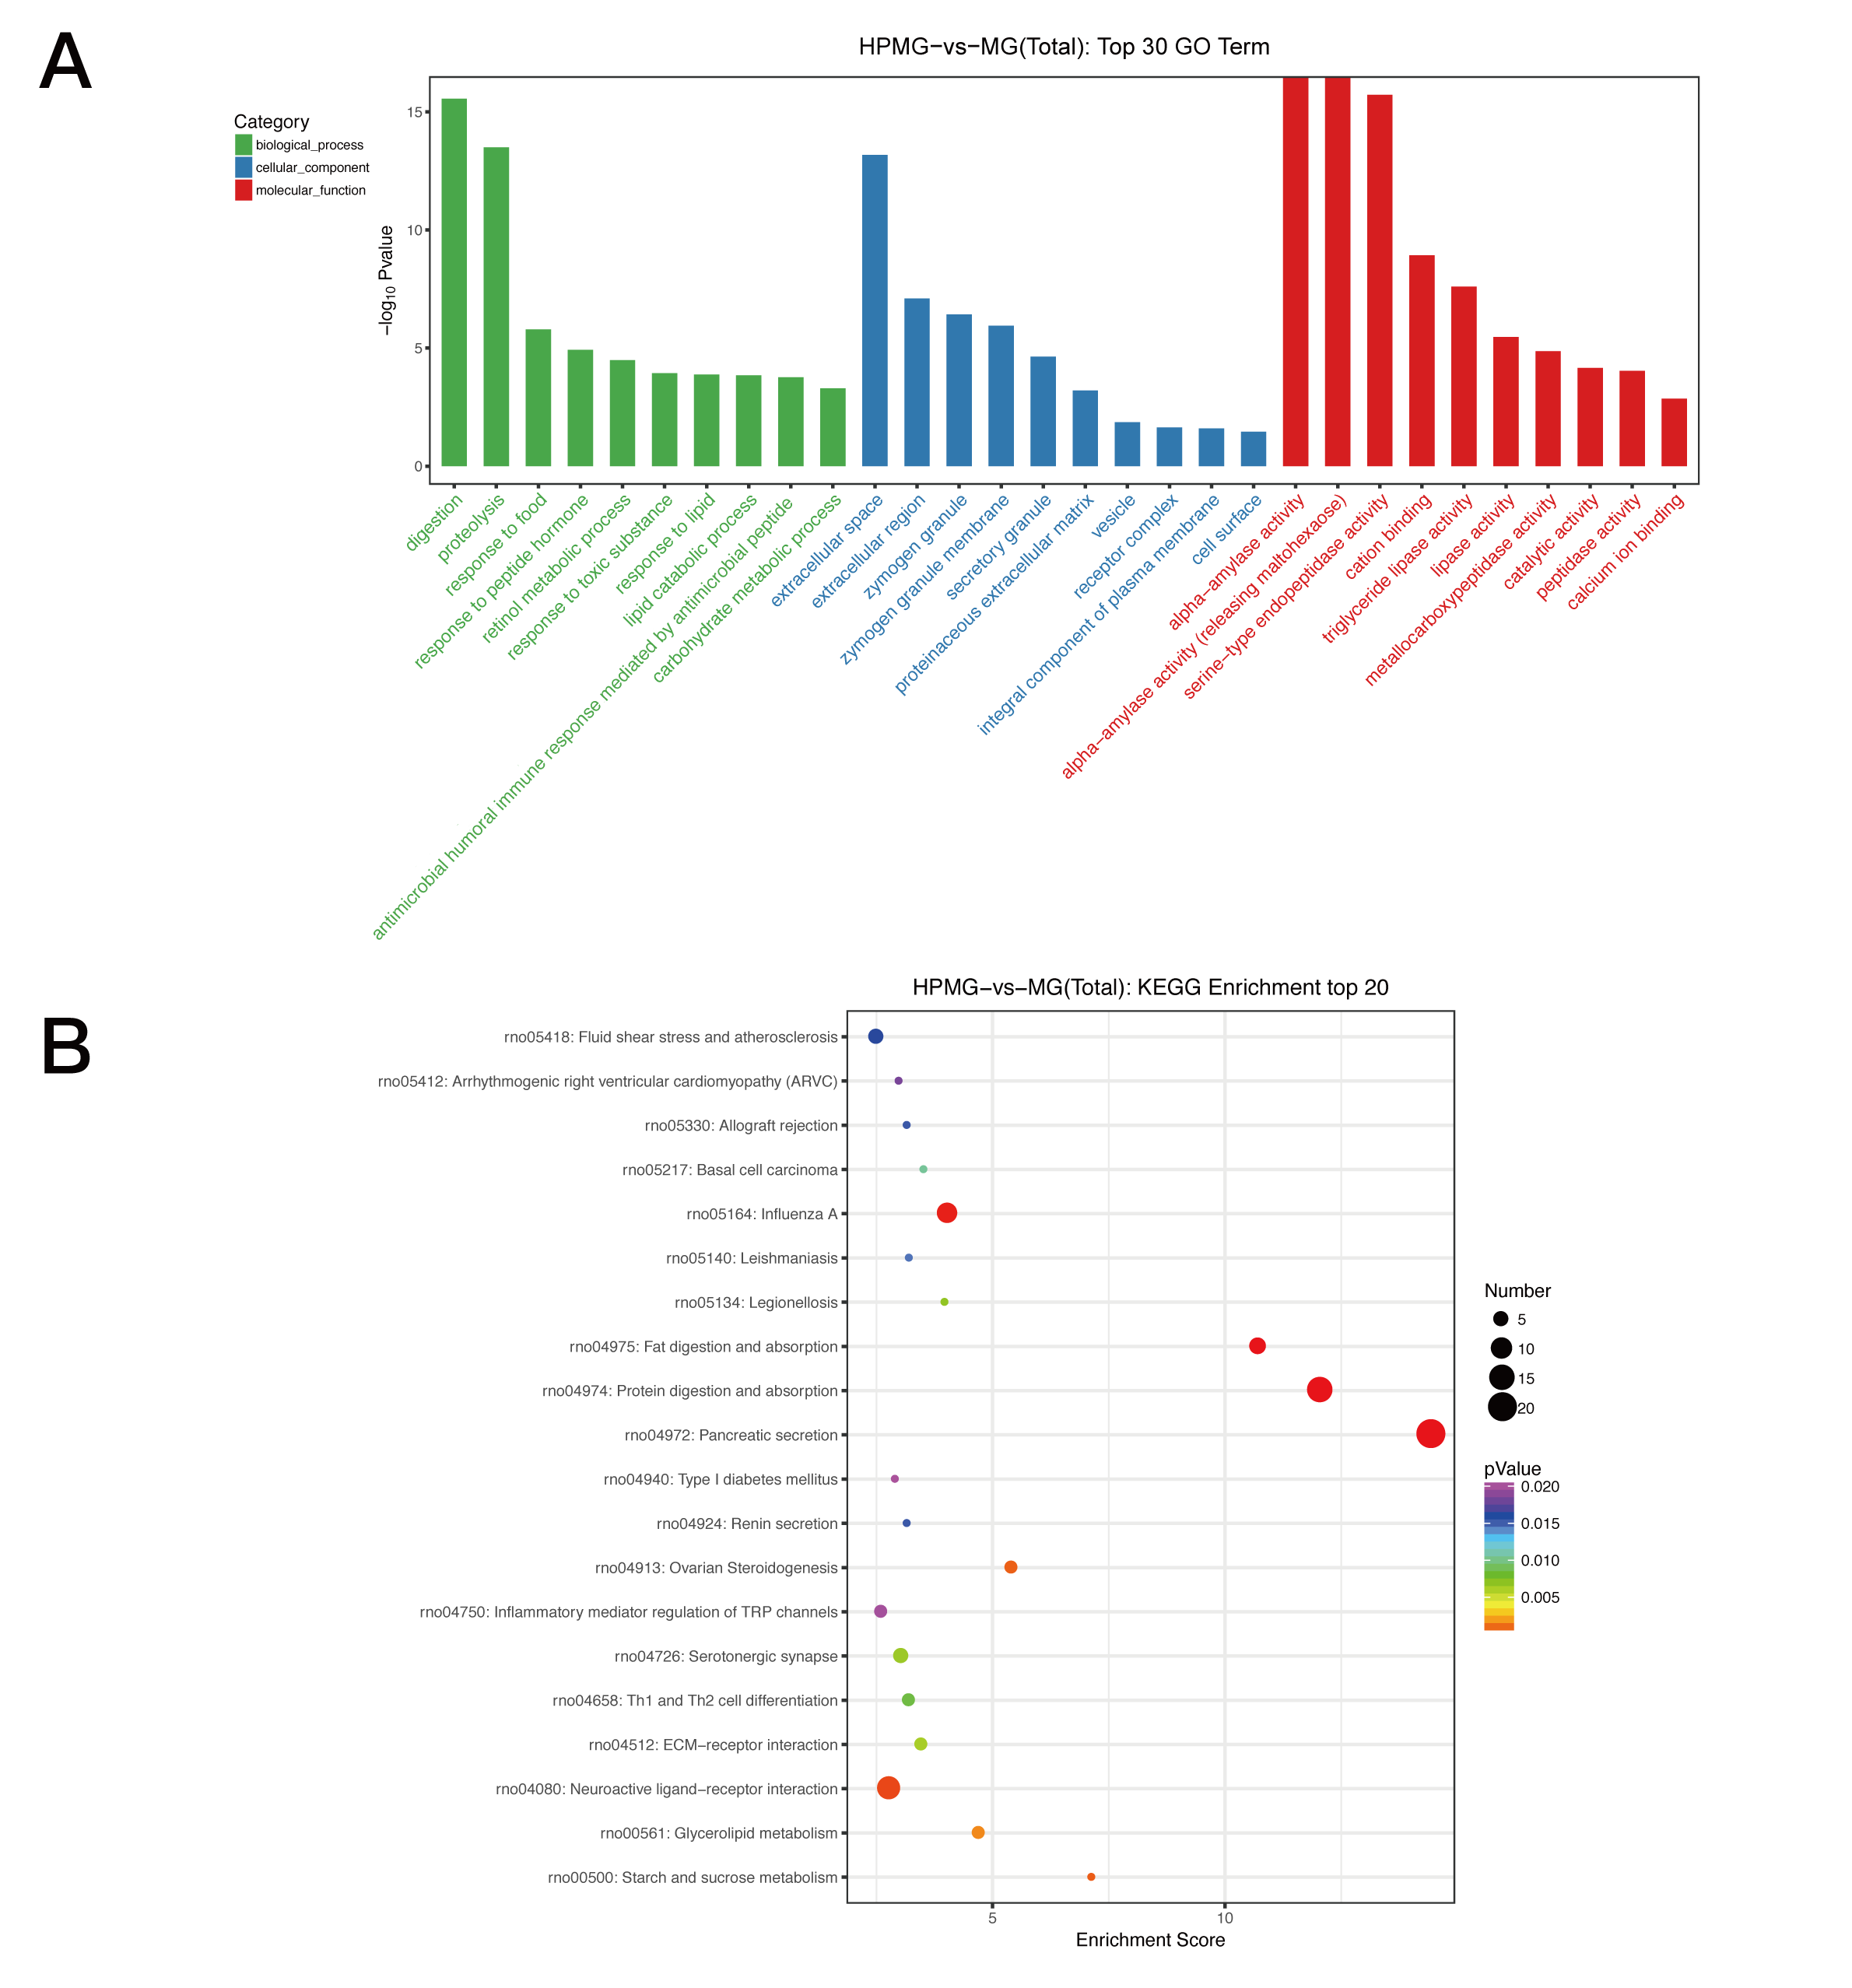


*Supplementary Figure 4* GO and KEGG enrichment analysis of the DE mRNAs between HPMG and MG rats

Supplementary Figure 4 (A) top 30 GO terms from the mRNA enrichment analysis and (B) top 20 significant KEGG pathways between HPMG and MG. differentially expressed (DE); MG: model group; HPMG: herb-partitioned moxibustion group.
